# Supplementary material
Source: publisher site journal article supplement (https://www.dovepress.com/article/269637)
Supplement: Supplementary file 1 [file get_supplementary_file.php]

**Supplemental Material**

**Supplement 1: Search Strategy**

**Supplement 2: List of Data Extraction Elements**

**Supplement 3: NIH Study Quality Assessments**

**eTable 1: Any Pneumonia – Risk Differences**

**eTable 2: Serious Pneumonia – Risk Differences**

**eTable 3: Any Pneumonia – Random-Effects Model**

**eTable 4: Serious Pneumonia – Random-Effects Model**

**SUPPLEMENT 1. Search Strategy**

**PubMed Search Strategy**

**Patient/Disease Type**

"chronic obstructive lung disease"[All Fields] OR "Pulmonary Disease, Chronic Obstructive"[Mesh] OR "Bronchitis, Chronic"[Mesh] OR "chronic airflow obstruction"[All Fields] OR "chronic airway obstruction"[All Fields] OR "chronic obstructive bronchitis"[All Fields] OR "chronic obstructive bronchopulmonary disease"[All Fields] OR "chronic obstructive lung disease"[All Fields] OR ”emphysema”[All Fields]

OR

(chronic AND obstructive AND ("lung diseases"[MeSH Terms] OR ("lung" AND "diseases") OR "lung diseases" OR ("lung" AND "disorder") OR "lung disorder")) OR "chronic obstructive pulmonary disease" OR "chronic obstructive pulmonary disorder" OR "chronic obstructive respiratory disease" OR "COPD" OR (("lung"[MeSH Terms] OR "lung") AND chronic AND obstructive AND ("disease"[MeSH Terms] OR "disease")) OR "lung disease, chronic obstructive" OR "lung diseases, obstructive" OR "obstructive lung disease" OR (("lung diseases, obstructive"[MeSH Terms] OR ("lung" AND "diseases" AND "obstructive") OR "obstructive lung diseases" OR ("obstructive" AND "lung" AND "disease") OR "obstructive lung disease") AND chronic) OR "obstructive pulmonary disease" OR "obstructive respiratory disease" OR "obstructive respiratory tract disease" OR "pulmonary disease, chronic obstructive" OR (("lung diseases"[MeSH Terms] OR ("lung" AND "diseases") OR "lung diseases" OR ("pulmonary" AND "disorder") OR "pulmonary disorder") AND chronic AND obstructive)

AND

**Exposure**

(("fluticasone"[MeSH Terms] OR "fluticasone" OR ("fluticasone" AND "propionate") OR "fluticasone propionate") AND plus AND ("salmeterol xinafoate"[MeSH Terms] OR ("salmeterol" AND "xinafoate") OR "salmeterol xinafoate")) OR "advair" OR (("fluticasone-salmeterol drug combination"[MeSH Terms] OR ("fluticasone-salmeterol" AND "drug" AND "combination") OR "fluticasone-salmeterol drug combination" OR "advair") AND discus) OR "advair diskus" OR "advair diskus 100/50" OR (("fluticasone-salmeterol drug combination"[MeSH Terms] OR ("fluticasone-salmeterol" AND "drug" AND "combination") OR "fluticasone-salmeterol drug combination" OR ("advair" AND "diskus") OR "advair diskus") AND 250/50) OR (("fluticasone-salmeterol drug combination"[MeSH Terms] OR ("fluticasone-salmeterol" AND "drug" AND "combination") OR "fluticasone-salmeterol drug combination" OR ("advair" AND "diskus") OR "advair diskus") AND 500/50) OR "advair hfa" OR spiromax OR (airduo AND respiclick) OR spiromax OR "atmadisc" OR (("fluticasone"[MeSH Terms] OR "fluticasone" OR ("fluticasone" AND "propionate") OR "fluticasone propionate") AND plus AND ("salmeterol xinafoate"[MeSH Terms] OR ("salmeterol" AND "xinafoate") OR "salmeterol xinafoate")) OR ("fluticasone-salmeterol drug combination"[MeSH Terms] OR ("fluticasone-salmeterol" AND "drug" AND "combination") OR "fluticasone-salmeterol drug combination" OR ("fluticasone" AND "propionate" AND "salmeterol" AND "xinafoate" AND "drug" AND "combination")) OR (("salmeterol xinafoate"[MeSH Terms] OR ("salmeterol" AND "xinafoate") OR "salmeterol xinafoate") AND plus AND ("fluticasone"[MeSH Terms] OR "fluticasone" OR ("fluticasone" AND "propionate") OR "fluticasone propionate")) OR "seretide" OR "seretide accuhaler" OR "seretide diskus" OR "seretide evohaler" OR "viani" OR inhub OR "fluticasone propionate" OR respiclick OR diskus OR diskus OR diskus OR inalador OR (cci AND 18781) OR "eustidil" OR (("fluticasone"[MeSH Terms] OR "fluticasone" OR "flixonase") AND ari) OR diskus OR inalador OR nebules OR "flixotide" OR (("fluticasone"[MeSH Terms] OR "fluticasone" OR "flixotide") AND accuhaler) OR (("fluticasone"[MeSH Terms] OR "fluticasone" OR "flixotide") AND disk) OR (("fluticasone"[MeSH Terms] OR "fluticasone" OR "flixotide") AND disks) OR (("fluticasone"[MeSH Terms] OR "fluticasone" OR "flixotide") AND diskus) OR (("fluticasone"[MeSH Terms] OR "fluticasone" OR "flixotide") AND diskus AND junior) OR (("fluticasone"[MeSH Terms] OR "fluticasone" OR "flixotide") AND dysk) OR "flixotide evohaler" OR (("fluticasone"[MeSH Terms] OR "fluticasone" OR "flixotide") AND forte) OR (("fluticasone"[MeSH Terms] OR "fluticasone" OR "flixotide") AND ("nebulizers and vaporizers"[MeSH Terms] OR ("nebulizers" AND "vaporizers") OR "nebulizers and vaporizers" OR "inhaler")) OR (("fluticasone"[MeSH Terms] OR "fluticasone" OR "flixotide") AND junior) OR "flixotide nebules" OR (("fluticasone"[MeSH Terms] OR "fluticasone" OR "flixotide") AND standard) OR ("nebulizers and vaporizers"[MeSH Terms] OR ("nebulizers" AND "vaporizers") OR "nebulizers and vaporizers" OR "inhaler") OR "flonase" OR "flovent" OR (("fluticasone"[MeSH Terms] OR "fluticasone" OR "flovent") AND diskus) OR (("fluticasone"[MeSH Terms] OR "fluticasone" OR "flovent") AND diskus AND 100) OR (("fluticasone"[MeSH Terms] OR "fluticasone" OR "flovent") AND diskus AND 250) OR (("fluticasone"[MeSH Terms] OR "fluticasone" OR "flovent") AND diskus AND 50) OR "flovent hfa" OR (("fluticasone"[MeSH Terms] OR "fluticasone" OR "flovent") AND rotadisk) OR "flunase" OR accuhaler OR "fluticasone 17 propionate" OR "fluticasone propionate" OR "flutide" OR (flutide AND diskus) OR (flutide AND evohaler) OR "flutivate" OR (("Gondwana Res"[Journal] OR "Gastroenterol Rep (Oxf)"[Journal] OR "gr") AND 18781) OR accuhaler OR axahaler OR "sonera" OR accuhaler OR "fluticasone furoate" OR "arnuity" OR (arnuity AND ellipta) OR (("fluticasone"[MeSH Terms] OR "fluticasone") AND 17 AND furoate) OR "fluticasone furoate" OR (("fluticasone furoate"[Supplementary Concept] OR "fluticasone furoate") AND gsk) OR "gw685698" OR "gw685698x" OR "gw685698" OR "gw685698x" OR (("fluticasone furoate"[Supplementary Concept] OR "fluticasone furoate") AND plus AND ("vilanterol"[Supplementary Concept] OR "vilanterol")) OR "breo" OR "breo ellipta" OR (("fluticasone furoate"[Supplementary Concept] OR "fluticasone furoate") AND plus AND ("vilanterol"[Supplementary Concept] OR "vilanterol")) OR (("fluticasone furoate"[Supplementary Concept] OR "fluticasone furoate") AND plus AND ("vilanterol"[Supplementary Concept] OR "vilanterol") AND trifenatate) OR "relvar" OR (relvar AND ellipta) OR (revinty AND ellipta) OR (("vilanterol"[Supplementary Concept] OR "vilanterol") AND plus AND ("fluticasone furoate"[Supplementary Concept] OR "fluticasone furoate")) OR (("vilanterol"[Supplementary Concept] OR "vilanterol") AND trifenatate AND plus AND ("fluticasone furoate"[Supplementary Concept] OR "fluticasone furoate"))

OR

("fluticasone furoate-vilanterol trifenatate"[Supplementary Concept] OR "fluticasone furoate"[Supplementary Concept] OR "fluticasone-formoterol"[Supplementary Concept] OR "fluticasone propionate-17-carboxylic acid"[Supplementary Concept] OR "Fluticasone-Salmeterol Drug Combination"[Mesh] OR "Fluticasone"[Mesh]) OR "FLUTICASONE"[All Fields]

OR

"budesonide" OR "aerox" OR "b cort" OR "bidien" OR "budecort" OR (budecort AND novolizer) OR (budecort AND nt) OR "budefat" OR "budelin" OR "budelin novolizer" OR "budenofalk" OR "budenoside" OR "budes" OR "budeson" OR (budeson AND 3) OR "budesonide" OR (("budesonide"[MeSH Terms] OR "budesonide") AND easyhaler) OR "budiair" OR respules OR "budo-san" OR "budon" OR "budosan" OR "cortiment" OR (cortiment AND mmx) OR "eltair" OR "entocort" OR "entocort ec" OR "giona easyhaler" OR (("Med Aromat Plants (Los Angel)"[Journal] OR "map") AND 0010) OR "miflonide" OR "novopulmon" OR "numark" OR "preferid" OR "pulmicort" OR "pulmicort-flexhaler" OR "pulmicort-respules" OR "pulmicort-turbuhaler" OR "s 1320" OR "s1320" OR "spirocort" OR (spirocort AND turbuhaler) OR "uceris"

OR

("budesonide") OR ("Budesonide, Formoterol Fumarate Drug Combination"[Mesh] OR "Budesonide"[Mesh])

OR

“budesonide-plus-formoterol” OR “assieme” OR “assieme-mite” OR “assiememite” OR “biresp-spiromax” OR “budesonide-plus-formoterol” OR “budesonide-plus-formoterol fumarate” OR “budesonide-plus-formoterol-fumarate-dihydrate” OR “budesonide, formoterol-fumarate-drug-combination” OR “budesonide-formoterol” OR “budesonide/formoterol” OR “bufar” OR “bufar easyhaler” OR “bufoler” OR “bufoler-easyhaler” OR “bufomix” OR “bufomix-easyhaler” OR “duoresp-spiromax” OR “duori” OR “duori-easyhaler” OR “fobuler” OR “formoterol-fumarate dihydrate-plus-budesonide” OR “formoterol fumarate-plus-budesonide” OR “formoterol-plus-budesonide” OR “formoterol-budesonide” OR “formoterol/budesonide” OR “gardette” OR “gardette-forte” OR “gardette-mite” OR “orbufox” OR “orbufox-easyhaler” OR “orest” OR “orest-easyhaler” OR “pulentia” OR “pulmalio” OR “pulmelia” OR “pulmoton” OR “rilast” OR “rilast-forte” OR “rilast-forte-turbuhaler” OR “rilast-turbuhaler” OR “symbicort” OR “symbiocort-forte-turbohaler” OR “symbiocort-forte-turbuhaler” OR “symbiocort-mite-turbohaler” OR “symbiocort-mite turbuhaler” OR “symbiocort-rapihaler” OR “symbiocort-turbohaler” OR “symbiocort-turbuhaler” OR “symbiocortmite” OR “vyaler-spiromax” OR “vylaer-spiromax”

AND

**Outcome**

("pneumonia"[Mesh] OR "pneumonia"[All Fields]) OR ”Respiratory-Tract-Infections” OR ”acute-respiratory-infection” OR ”lower-respiratory-infection” OR ”lower-respiratory-tract-infection” OR (pneumon* OR bronchopneumon* OR pleuropneumon*) OR ”Bronchitis” OR (bronchit* OR bronchiolit*)

AND

**Publication Type/Study Type**

Filters: Clinical Trial; Observational Study; Randomized Controlled Trial; Pragmatic Clinical Trial; Clinical Trial, Phase IV; Clinical Trial, Phase III; Clinical Study; Multicenter Study; NOT Clinical Trial, Phase II; NOT Clinical Trial, Phase I

**EMBASE Search Strategy**

**Patient/Disease Type**

'chronic obstructive lung disease'/exp OR 'chronic airflow obstruction' OR 'chronic airway obstruction' OR 'chronic obstructive bronchitis' OR 'chronic obstructive bronchopulmonary disease' OR 'chronic obstructive lung disease' OR 'chronic obstructive lung disorder' OR 'chronic obstructive pulmonary disease' OR 'chronic obstructive pulmonary disorder' OR 'chronic obstructive respiratory disease' OR 'copd' OR 'lung chronic obstructive disease' OR 'lung disease, chronic obstructive' OR 'lung diseases, obstructive' OR 'obstructive lung disease' OR 'obstructive lung disease, chronic' OR 'obstructive pulmonary disease' OR 'obstructive respiratory disease' OR 'obstructive respiratory tract disease' OR 'pulmonary disease, chronic obstructive' OR 'pulmonary disorder, chronic obstructive' OR 'emphysema'

AND

**Exposure**

('fluticasone propionate plus salmeterol xinafoate'/exp OR 'advair' OR 'advair discus' OR 'advair diskus' OR 'advair diskus 100/50' OR 'advair diskus 250/50' OR 'advair diskus 500/50' OR 'advair hfa' OR 'aerivio' OR 'aerivio spiromax' OR 'airduo respiclick' OR 'airexar' OR 'airexar spiromax' OR 'atmadisc' OR 'fluticasone propionate plus salmeterol xinafoate' OR 'fluticasone propionate, salmeterol xinafoate drug combination' OR 'salmeterol xinafoate plus fluticasone propionate' OR 'seretide' OR 'seretide accuhaler' OR 'seretide diskus' OR 'seretide evohaler' OR 'serflu' OR 'viani' OR 'wixela inhub' OR 'fluticasone propionate'/exp OR 'aerosona' OR 'armonair respiclick' OR 'arquist' OR 'asmatil' OR 'asmatil diskus' OR 'asmo-lavi' OR 'asmo-lavi diskus' OR 'atemur' OR 'atemur mite' OR 'axotide' OR 'brisovent' OR 'brisovent diskus' OR 'brisovent inalador' OR 'casoflune' OR 'cci 18781' OR 'cci18781' OR 'cortifil' OR 'eustidil (fluticasone propionate)' OR 'fanipos' OR 'flixonase ari' OR 'flixotaide' OR 'flixotaide diskus' OR 'flixotaide inalador' OR 'flixotaide nebules' OR 'flixotide' OR 'flixotide accuhaler' OR 'flixotide disk' OR 'flixotide disks' OR 'flixotide diskus' OR 'flixotide diskus junior' OR 'flixotide dysk' OR 'flixotide evohaler' OR 'flixotide forte' OR 'flixotide inhaler' OR 'flixotide junior' OR 'flixotide nebules' OR 'flixotide standard' OR 'flixovate' OR 'floebb inhaler' OR 'flonase' OR 'flovent' OR 'flovent diskus' OR 'flovent diskus 100' OR 'flovent diskus 250' OR 'flovent diskus 50' OR 'flovent hfa' OR 'flovent rotadisk' OR 'flugenix' OR 'flunase' OR 'flunutrac' OR 'flusonal accuhaler' OR 'fluspiral' OR 'flutaide' OR 'flutica-teva' OR 'fluticasone 17 propionate' OR 'fluticasone propionate' OR 'fluticrem' OR 'flutide' OR 'flutide diskus' OR 'flutide evohaler' OR 'flutinase' OR 'flutirin' OR 'flutivate' OR 'fluxonal' OR 'gr 18781' OR 'gr18781' OR 'inalacor' OR 'inalacor accuhaler' OR 'pavetod' OR 'prutica' OR 'reviflut' OR 'reviflut axahaler' OR 'sonera' OR 'trialona' OR 'trialona accuhaler' OR 'truflo' OR 'ubizol' OR 'xhance' OR 'zoflut' OR 'flusonal' OR 'fluticasone furoate'/exp OR 'arnuity' OR 'arnuity ellipta' OR 'fluticasone 17 furoate' OR 'fluticasone furoate' OR 'fluticasone furoate gsk' OR 'gsk 685698' OR 'gsk685698' OR 'gw 685698' OR 'gw 685698x' OR 'gw685698' OR 'gw685698x' OR 'fluticasone furoate plus vilanterol'/exp OR 'breo' OR 'breo ellipta' OR 'fluticasone furoate plus triphenylacetic acid 4 [2 [ [6 [2 [ (2, 6 dichlorobenzyl) oxy] ethoxy] hexyl] amino] 1 hydroxyethyl] 2 (hydroxymethyl) phenol ester' OR 'fluticasone furoate plus vilanterol' OR 'fluticasone furoate plus vilanterol trifenatate' OR 'relovair' OR 'relvar' OR 'relvar ellipta' OR 'revinty ellipta' OR 'vilanterol plus fluticasone furoate' OR 'vilanterol trifenatate plus fluticasone furoate')

OR

‘budesonide’/exp OR ‘acorspray’ OR ‘aerox’ OR ‘b cort’ OR ‘bidien’ OR ‘budecol’ OR ‘budecort’ OR ‘budecort novolizer’ OR ‘budecort nt’ OR ‘budefat’ OR ‘budeflam’ OR ‘budelin’ OR ‘budelin novolizer’ OR ‘budeno’ OR ‘budenofalk’ OR ‘budenoside’ OR ‘budes’ OR ‘budeson’ OR ‘budeson 3’ OR ‘budesonide’ OR ‘budesonide easyhaler’ OR ‘budiair’ OR ‘budicort respules’ OR ‘budo-san’ OR ‘budon’ OR ‘budosan’ OR ‘bunase’ OR ‘buparid’ OR ‘butacort’ OR ‘clebudan’ OR ‘coramen’ OR ‘cortiment’ OR ‘cortiment mmx’ OR ‘cortimentmmx’ OR ‘cycortide’ OR ‘desonix’ OR ‘dexbudesonide’ OR ‘duasma’ OR ‘eltair’ OR ‘entocir’ OR ‘entocort’ OR ‘entocort ec’ OR ‘esonide’ OR ‘giona easyhaler’ OR ‘inflammide’ OR ‘jorveza’ OR ‘larbex’ OR ‘map 0010’ OR ‘map0010’ OR ‘miflo’ OR ‘miflonid’ OR ‘miflonide’ OR ‘miflonide breezhaler’ OR ‘miflonide inhaler’ OR ‘miflonil’ OR ‘mikicort’ OR ‘nebbud’ OR ‘neo-rinactive’ OR ‘novopulmon’ OR ‘novopulmon novolizer’ OR ‘numark’ OR ‘olfex’ OR ‘preferid’ OR ‘pulmaxan’ OR ‘pulmicon susp for nebuliser’ OR ‘pulmicon susp for nebulizer’ OR ‘pulmicort’ OR ‘pulmicort flexhaler’ OR ‘pulmicort respules’ OR ‘pulmicort turbuhaler’ OR ‘pulmoliseflam’ OR ‘pulmotide’ OR ‘respicort’ OR ‘ribujet’ OR ‘ribuspir’ OR ‘ribuvent’ OR ‘s 1320’ OR ‘s1320’ OR ‘spirocort’ OR ‘spirocort turbuhaler’ OR ‘uceris’

OR

'budesonide plus formoterol'/exp OR 'assieme' OR 'assieme mite' OR 'assiememite' OR 'biresp spiromax' OR 'budesonide plus formoterol' OR 'budesonide plus formoterol fumarate' OR 'budesonide plus formoterol fumarate dihydrate' OR 'budesonide, formoterol fumarate drug combination' OR 'budesonide-formoterol' OR 'budesonide/formoterol' OR 'bufar' OR 'bufar easyhaler' OR 'bufoler' OR 'bufoler easyhaler' OR 'bufomix' OR 'bufomix easyhaler' OR 'duoresp spiromax' OR 'duori' OR 'duori easyhaler' OR 'fobuler' OR 'formoterol fumarate dihydrate plus budesonide' OR 'formoterol fumarate plus budesonide' OR 'formoterol plus budesonide' OR 'formoterol-budesonide' OR 'formoterol/budesonide' OR 'gardette' OR 'gardette forte' OR 'gardette mite' OR 'orbufox' OR 'orbufox easyhaler' OR 'orest' OR 'orest easyhaler' OR 'pulentia' OR 'pulmalio' OR 'pulmelia' OR 'pulmoton' OR 'rilast' OR 'rilast forte' OR 'rilast forte turbuhaler' OR 'rilast turbuhaler' OR 'symbicort' OR 'symbiocort forte turbohaler' OR 'symbiocort forte turbuhaler' OR 'symbiocort mite turbohaler' OR 'symbiocort mite turbuhaler' OR 'symbiocort rapihaler' OR 'symbiocort turbohaler' OR 'symbiocort turbuhaler' OR 'symbiocortmite' OR 'vyaler spiromax' OR 'vylaer spiromax'

AND

**Outcome**

'pneumonia'/exp OR 'acute diffuse pneumonia' OR 'atrophic reticular pneumonia' OR 'enzootic pneumonia' OR 'peripneumonia' OR 'pleurisy, pneumonia' OR 'pleuritic pneumonia' OR 'pleuritis, pneumonia' OR 'pleuropneumonia' OR 'pleuropneumonitis' OR 'pneumonia' OR 'pneumonia pleuritica' OR 'pneumonia superficialis' OR 'pneumonic lung' OR 'pneumonic pleurisy' OR 'pneumonic pleuritis' OR 'pneumonitis' OR 'pulmonal inflammation' OR 'pulmonary inflammation' OR 'pulmonic inflammation' OR 'stable pneumonia' OR 'superficial pneumonia'

OR

[exp Respiratory Tract Infections/OR (acute respiratory infection*.tw.) OR (lower respiratory infection*.tw.) OR (lower respiratory tract infection*.tw.) OR exp Pneumonia/OR (pneumon* OR bronchopneumon* OR pleuropneumon*).tw. OR exp Bronchitis/OR (bronchit* OR bronchiolit*).tw].

AND

**Publication Type/Study Type**

'clinical trial'/exp OR 'clinical drug trial' OR 'clinical trial' OR 'major clinical trial' OR 'trial, clinical' OR 'observational study'/exp OR 'cohort analysis'/exp OR 'analysis, cohort' OR 'cohort analysis' OR 'cohort studies' OR 'cohort study' OR 'case control study'/exp OR 'case control study' OR 'case-control studies' OR 'case-control study' OR 'control study, case' OR 'matched case control' OR 'matched case control studies' OR 'matched case control study' OR 'outcomes research'/exp OR 'retrospective study'/exp OR 'ex post facto design' OR 'retrospective design' OR 'retrospective panel studies' OR 'retrospective panel study' OR 'retrospective studies' OR 'retrospective study' OR 'study, retrospective'

**SUPPLEMENT 2. List of Data Extraction Elements**

Study author

Publication year (sorted)

Study design (grouped)

Study period

Study duration (weeks)

Setting (Inpatient/Outpatient/both)

Country, Database

Budesonide dose, frequency, duration

Budesonide Single/Combination

Fluticasone dose, frequency, duration

Fluticasone Single/Combination

Inclusion criteria

Exclusion criteria

Number enrolled

Number evaluable

COPD Severity (GOLD or other)

Pneumonia diagnosis

Pneumonia severity

Age

Gender - % Male

Other demographics

Budesonide adjusted rate (95CI)

Budesonide unadjusted rate (95CI)

Budesonide n/N events

Fluticasone adjusted rate (95CI)

Fluticasone unadjusted rate (95CI)

Fluticasone n/N events

Hazard/Odds Ratios (95CI)

Ratio p-value

Covariables

Source of funding

Limitations noted (author, review team, other recs)

**Supplement 3: NIH Study Quality Assessments**

|  | **Randomized controlled trials** |
| --- | --- |
|  | Lipson, Barnacle 201714 |
| Key research question/aim | "randomized controlled trials demonstrating a sustained benefit in terms of lung function and patient-reported outcome measures compared with ICS/LABA alone" |
| 1. Was the study described as randomized, a randomized trial, a randomized clinical trial, or an RCT? | Yes |
| 2. Was the method of randomization adequate (i.e., use of randomly generated assignment)? | Yes |
| 3. Was the treatment allocation concealed (so that assignments could not be predicted)? | Undeterminable / Not applicable / Not reported, Likely to be reported in a methods publication |
| 4. Were study participants and providers blinded to treatment group assignment? | Yes |
| 5. Were the people assessing the outcomes blinded to the participants' group assignments? | Undeterminable/Not applicable/Not reported |
| 6. Were the groups similar at baseline on important characteristics that could affect outcomes (e.g., demographics, risk factors, co-morbid conditions)? | Yes |
| 7. Was the overall drop-out rate from the study at endpoint 20% or lower of the number allocated to treatment? | Yes |
| 8. Was the differential drop-out rate (between treatment groups) at endpoint 15 percentage points or lower? | Yes |
| 9. Was there high adherence to the intervention protocols for each treatment group? | Undeterminable/Not applicable/Not reported |
| 10. Were other interventions avoided or similar in the groups (e.g., similar background treatments)? | Yes |
| 11. Were outcomes assessed using valid and reliable measures, implemented consistently across all study participants? | Yes |
| 12. Did the authors report that the sample size was sufficiently large to be able to detect a difference in the main outcome between groups with at least 80% power? | Yes, Pneumonia was a secondary outcome; power was not reported |
| 13. Were outcomes reported or subgroups analyzed prespecified (i.e., identified before analyses were conducted)? | Yes, Including pneumonia and lower respiratory tract infections |
| 14. Were all randomized participants analyzed in the group to which they were originally assigned, i.e., did they use an intention-to-treat analysis? | Yes |
| Quality rating (good, fair, poor) | Good |
| Comments | Pneumonia reported in study is different than that reported at ClinicalTrials.gov. Direct statistical comparisons not reported for rate of pneumonia between budesonide doublet versus fluticasone triplet. |

|  | **Cohort studies** | | | | |
| --- | --- | --- | --- | --- | --- |
|  | Kern 201519 | Janson, Larsson (PATHOS) 201317 | Roberts, Mapel 201118 | Yang, Lai 201716 | Hirano, Fujita 201820 |
| Key research question/aim | [Note secondary objective] "This study also compared pneumonia rates for patients initiating either BFC or FSC as pneumonia is an important safety endpoint among patients receiving ICS/LABA combination therapy" | "we investigated the incidence of pneumonia and events related to pneumonia, including mortality, in a population with COPD treated with fixed combinations of inhaled corticosteroid/long acting β2-agonist (fluticasone/salmeterol or budesonide/formoterol)" | "This analysis assesses differences in outcomes, including exacerbations and associated healthcare service use, adherence to prescribed treatment regimen, healthcare costs, the use of rescue inhalers, and pneumonia events" | "we compared the effects of budesonide/formoterol and fluticasone/salmeterol on the occurrence of severe exacerbation and pneumonia" | "To clarify the relationship between ICS use and pneumonia in Japanese patients with COPD, we retrospectively analyzed the incidence of pneumonia in patients with COPD at our hospital." |
| 1. Was the research question or objective in this paper clearly stated? | Yes | Yes | Yes | Yes | Yes |
| 2. Was the study population clearly specified and defined? | Yes | Yes | Yes | Yes | Yes |
| 3. Was the participation rate of eligible persons at least 50%? | Yes, database study of all patients meeting inclusion criteria | Yes | Undeterminable/Not applicable/Not reported | Yes | No |
| 4. Were all the subjects selected or recruited from the same or similar populations (including the same time period)? Were inclusion and exclusion criteria for being in the study prespecified and applied uniformly to all participants? | Yes | Yes | Yes | Yes | Yes |
| 5. Was a sample size justification, power description, or variance and effect estimates provided? | Undeterminable/Not applicable/Not reported, Sample size justified for effectiveness outcome, but Not reported for pneumonia | Undeterminable/Not applicable/Not reported | No | Undeterminable/Not applicable/Not reported | Undeterminable/Not applicable/Not reported |
| 6. For the analyses in this paper, were the exposure(s) of interest measured prior to the outcome(s) being measured? | Yes | Yes | Yes | Yes | Yes |
| 7. Was the timeframe sufficient so that one could reasonably expect to see an association between exposure and outcome if it existed? | Yes, 52 weeks | Yes | Yes | Undeterminable/Not applicable/Not reported | Yes |
| 8. For exposures that can vary in amount or level, did the study examine different levels of the exposure as related to the outcome (e.g., categories of exposure, or exposure measured as continuous variable)? | No | Yes | No | No | Yes |
| 9. Were the exposure measures (independent variables) clearly defined, valid, reliable, and implemented consistently across all study participants? | Yes | Yes | Yes | Yes | Yes |
| 10. Was the exposure(s) assessed more than once over time? | Yes, but subjects did not necessarily have continuous exposure, which was not measured | Undeterminable/Not applicable/Not reported | No | No | Yes |
| 11. Were the outcome measures (dependent variables) clearly defined, valid, reliable, and implemented consistently across all study participants? | Yes | Yes | Undeterminable/Not applicable/Not reported; study used "pneumonia-related utilization"; services in hospitals, emergency dept, office visits | Yes | Yes |
| 12. Were the outcome assessors blinded to the exposure status of participants? | Undeterminable/Not applicable/Not reported | Undeterminable/Not applicable/Not reported | Undeterminable/Not applicable/Not reported | Undeterminable/Not applicable/Not reported | Undeterminable/Not applicable/Not reported |
| 13. Was loss to follow-up after baseline 20% or less? | Undeterminable/Not applicable/Not reported | Undeterminable/Not applicable/Not reported | Undeterminable/Not applicable/Not reported | Undeterminable/Not applicable/Not reported | Undeterminable/Not applicable/Not reported |
| 14. Were key potential confounding variables measured and adjusted statistically for their impact on the relationship between exposure(s) and outcome(s)? | Yes | Yes | Yes | Yes | No (Between ICS groups only crude comparisons were made) |
| Quality rating (good, fair, poor) | Good (However, in a cohort design, authors reported hazard ratios as odds ratios, perhaps terminology error) | Good | Fair | Good | Fair |
| Comments | Lack of clinical data (smoking, lung function, COPD severity), inconsistencies, coding errors. Subjects only filled either budesonide/fluticasone and average of 4 times in 12 month follow-up period, thus exposure was estimated to be 33% to 34% of the period, "In fact, 34% of BFC patients and 33% of FSC patients only had a single fill of the index medication." | Multiple subgroups all favor fluticasone for *higher* rates per 100 person-years for pneumonia. Duration or adherence was Not reported. | Pneumonia not clinically measured, surrogate of "pneumonia-related utilization". COPD not clinically verified. Disease severity indicator was limited. This was primarily an economics and health utilization study. | COPD and pneumonia Not clinically defined. Pneumonia severity defined by surrogate data from emergency department visits or hospital admissions. ICS regimen and adherence Not reported (exposure) | Study primary objective was to compare ICS vs no-ICS. Sample size stratified to budesonide and fluticasone was too small to demonstrate statistical significance and were not controlled or matched |

BFC, budesonide/formoterol combination; COPD, chronic obstructive pulmonary disease; dept, department; FSC, fluticasone/salmeterol combination; ICS, inhaled corticosteroid; LABA, long-acting β2-agonist.

**eTable 1: Any Pneumonia – Risk Differences**

| Fixed-Effects Model (k = 5) |  |
| --- | --- |
| I2 (total heterogeneity / total variability) | 0.00% |
| H2 (total variability / sampling variability) | 0.42 |
| Test for Heterogeneity | Q(df = 4) = 1.681, p-val = 0.794 |
| Model Results (log scale) | Estimate: 0.015 |
|  | SE: 0.003 |
|  | Zval: 5.569 |
|  | Pval: <0.001 |
|  | ci.lb: 0.010 |
|  | ci.ub: 0.020 |

**eTable 2: Serious Pneumonia – Risk Differences**

| Fixed-Effects Model (k = 5) |  |
| --- | --- |
| I2 (total heterogeneity / total variability) | 73.66% |
| H2 (total variability / sampling variability) | 3.80 |
| Test for Heterogeneity | Q(df = 4) = 15.188, p-val = 0.004 |
| Model Results (log scale) | Estimate: 0.013 |
|  | SE: 0.002 |
|  | Zval: 5.663 |
|  | Pval: <0.001 |
|  | ci.lb: 0.009 |
|  | ci.ub: 0.018 |

**eTable 3: Any Pneumonia – Random-Effects Model**

| Random-Effects Model (k = 5; tau2 estimator: DL) |  |
| --- | --- |
| tau2 (estimated amount of total heterogeneity) | 0.0034 (SE = 0.0078) |
| tau (square root of estimated tau2 value) | 0.0583 |
| I2 (total heterogeneity / total variability) | 35.97% |
| H2 (total variability / sampling variability) | 1.56 |
| Test for Heterogeneity | Q(df = 4) = 6.2474, p-val = 0.1814 |
| Model Results (log scale) | Estimate: 0.1305 |
|  | SE: 0.0484 |
|  | Zval: 2.6980 |
|  | Pval: 0.0070 |
|  | ci.lb: 0.0357 |
|  | ci.ub: 0.2252 |
|  | Signif: ** |
| Model Results (RR scale): | Estimate: 1.139 |
|  | ci.lb: 1.036 |
|  | ci.ub: 1.253 |

Signif. codes: 0 ‘***’ 0.001 ‘**’ 0.01 ‘*’ 0.05 ‘.’ 0.1 ‘ ’ 1

**eTable 4: Serious Pneumonia – Random-Effects Model**

| Random-Effects Model (k = 5; tau2 estimator: DL) |  |
| --- | --- |
| tau2 (estimated amount of total heterogeneity) | 0 (SE = 0.0063) |
| tau (square root of estimated tau2 value) | 0 |
| I2 (total heterogeneity / total variability) | 0.00% |
| H2 (total variability / sampling variability) | 1.00 |
| Test for Heterogeneity | Q(df = 4) = 3.9023, p-val = 0.4194 |
| Model Results (log scale) | Estimate: 0.1335 |
|  | SE: 0.0237 |
|  | Zval: 5.6310 |
|  | Pval: <0.0001 |
|  | ci.lb: 0.0870 |
|  | ci.ub: 0.1800 |
|  | Signif: *** |
| Model Results (RR scale): | Estimate: 1.143 |
|  | ci.lb: 1.091 |
|  | ci.ub: 1.197 |

Signif. codes: 0 ‘***’ 0.001 ‘**’ 0.01 ‘*’ 0.05 ‘.’ 0.1 ‘ ’ 1
